# Supplementary material for: Orthopaedic trauma patients’ experiences with emergency department care and follow-up through Virtual Fracture Care review: a qualitative study
Source: PubMed Central journal article supplement — BMJ Open. 2024 Feb 21;14(2):e076040. doi: 10.1136/bmjopen-2023-076040 (PMC10882368; doi:10.1136/bmjopen-2023-076040), 2024-02-21
Supplement: bmjopen-2023-076040supp002.pdf [file bmjopen-2023-076040supp002.pdf]

## Topic list

---

- How did you end up at the emergency department (ED)?
  - Could you give a brief overview of how your ED visit unfolded?
  - What did you expect from your ED visit?
  - To what extent where your expectations met?
  - How would you describe the interactions with the healthcare professionals during your ED visit?
  - To what extent did you feel involved in the care during your ED visit?
  - Wat information did you receive during your ED visit (regarding your initial diagnosis and treatment options)?
  - How do you look back on the telephone call with the doctor the next day (regarding your definite diagnose and treatment)?
  - If you had to give a score for your satisfaction with the received care, what score would you give (1 = least satisfied, 10 = most satisfied)?
  - Could you elaborate on this score?
  - How could this score be increased by 1 point?
  - Do you have any further improvement suggestions?
-
